# Supplementary material for: Highly sensitive glucose sensors based on enzyme-modified whole-graphene solution-gated transistors
Source: PubMed Central journal article supplement — Sci Rep. 2015 Feb 6;5:8311. doi: 10.1038/srep08311 (PMC4319171; doi:10.1038/srep08311), 2015-02-06
Supplement: srep08311-s1.pdf [file srep08311-s1.pdf]

## Supporting Information

Correspondence and requests for materials should be address to F.Y (email address: apafyan@polyu.edu.hk)

### Highly sensitive glucose sensors based on enzyme-modified whole-graphene solution-gated transistors

Meng Zhang, Caizhi Liao, Chun Hin Mak, Peng You, Chee Leung Mak, Feng Yan\*

Department of Applied Physics, The Hong Kong Polytechnic University, Hong Kong.

#### Figures:

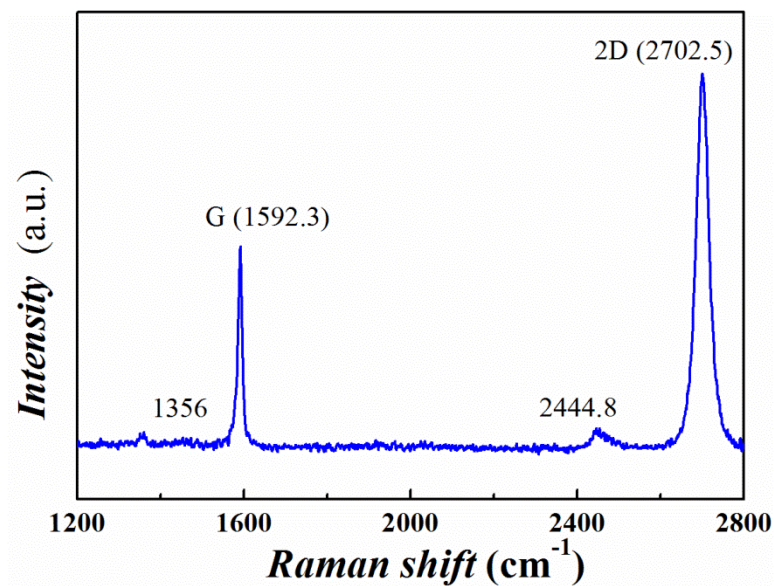

Figure S1: Raman spectrum of a CVD graphene on Si substrate.

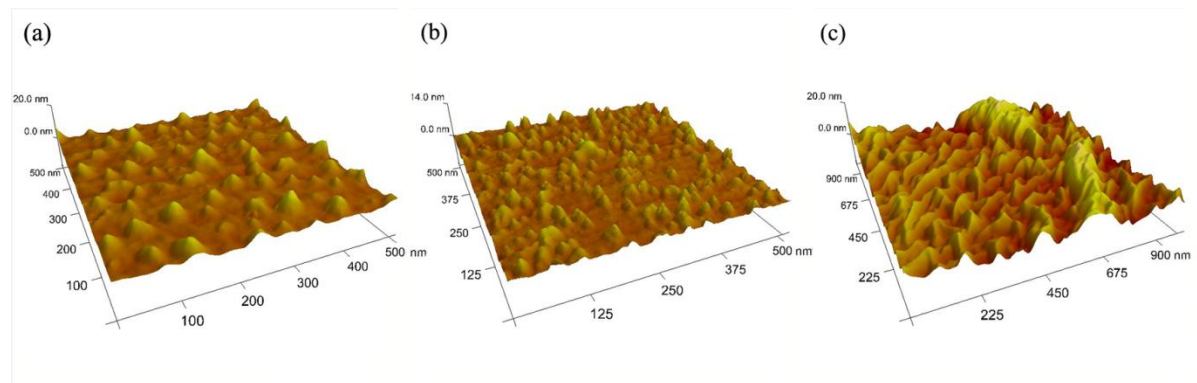

**Figure S2.** AFM images of the PtNPs deposited on graphene films with the deposition time of (a) 90s, (b) 120s and (c) 150s.

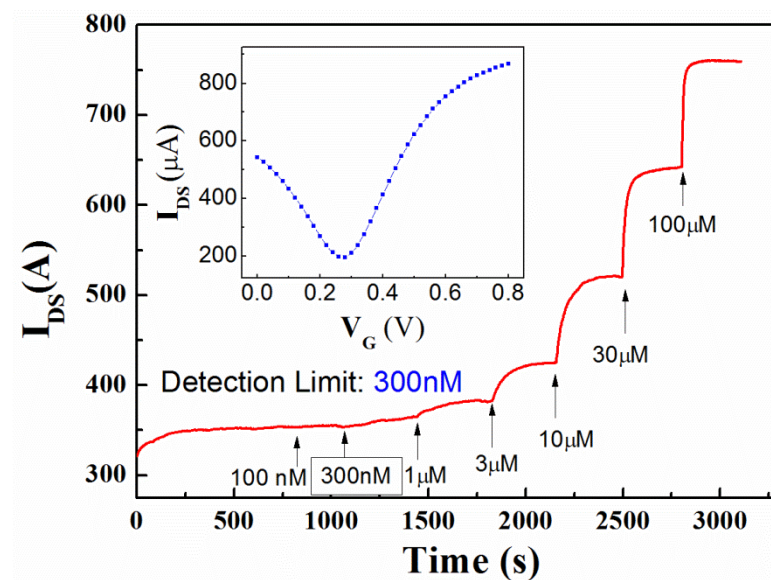

**Figure S3.** The channel current responses of a SGGT with PtNP-modified graphene gate (deposition time: 90s) to additions of  $H_2O_2$  with different concentrations measured at the fixed voltages of  $V_G = 0.7V$  and  $V_{DS} = 0.05V$ . *Inset:* the transfer curve of the device measured in PBS solution,  $V_{DS} = 0.05V$ .

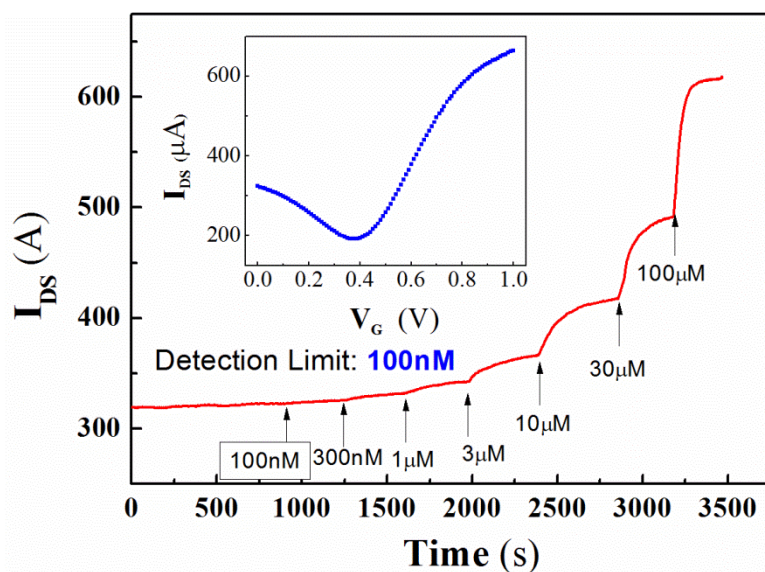

**Figure S4.** The channel current responses of a SGGT with PtNP-modified graphene gate (deposition time: 150s) to additions of  $H_2O_2$  with different concentrations measured at the fixed voltages of  $V_G = 0.7V$  and  $V_{DS} = 0.05V$ . *Inset:* the transfer curve of the device measured in PBS solution,  $V_{DS} = 0.05V$ .

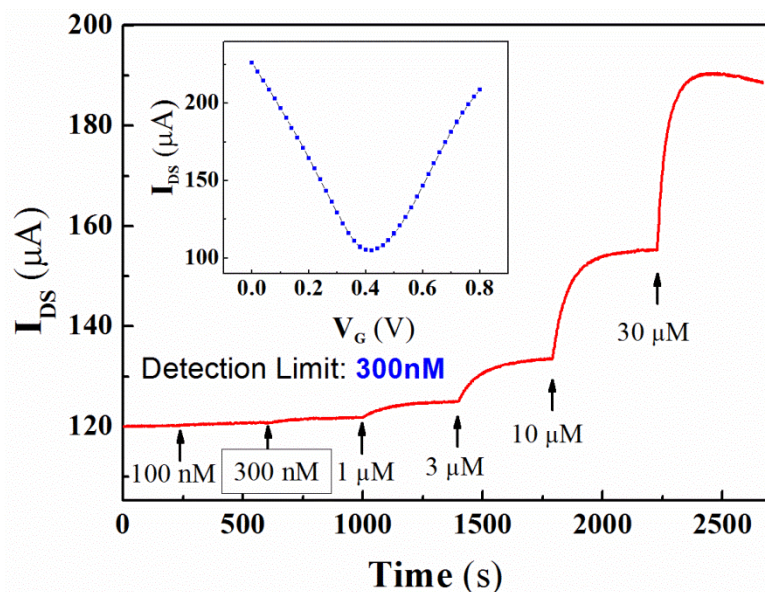

**Figure S5.** The channel current responses of a SGGT with Au nanoparticles modified on the graphene gate to additions of  $H_2O_2$  with different concentrations measured at the fixed voltages of  $V_G = 0.7V$  and  $V_{DS} = 0.05V$ . *Inset:* the transfer curve of the device measured in PBS solution,  $V_{DS} = 0.05V$ .

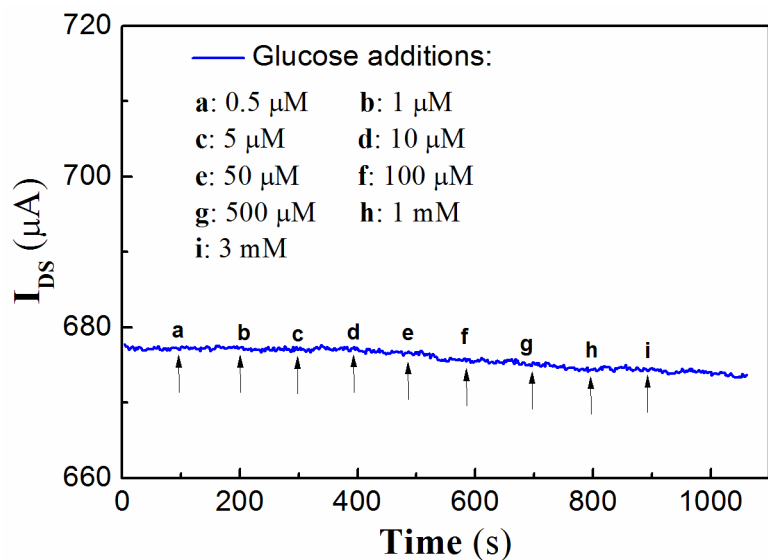

**Figure S6.** The channel current responses of a SGGT with PtNPs/graphene gate to additions of glucose.  $V_{DS}=0.05V$ ,  $V_G=0.7V$ .

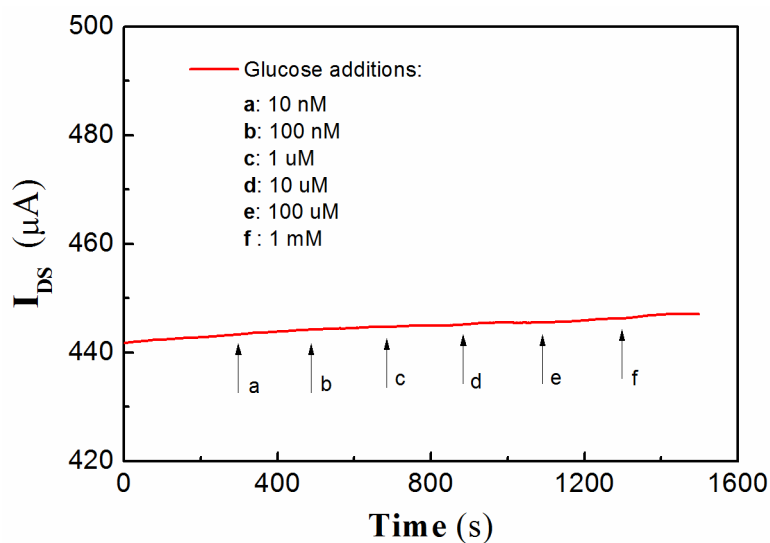

**Figure S7.** The channel current responses of a SGGT with GOx-CHIT/Nafion/graphene gate to additions of glucose.  $V_{DS}=0.05V$ ,  $V_G=0.7V$ .

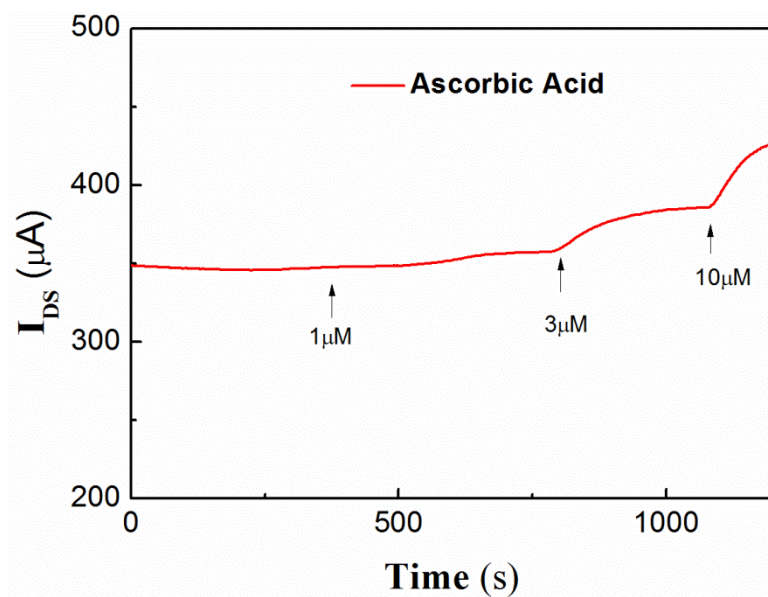

**Figure S8.** The channel current responses of a SGGT with PtNPs modified on the graphene gate to additions of ascorbic acid(AA) with different concentrations measured at the fixed voltages of  $V_G = 0.7V$  and  $V_{DS} = 0.05V$ .
